# Supplementary material for: SnO2 decorated graphene nanocomposite anode materials prepared via an up-scalable wet-mechanochemical process for sodium ion batteries
Source: Royal Society of Chemistry journal article supplement (doi:10.1039/c4ra09699a), 2014-01-01
Supplement: c4ra09699a1.pdf [file c4ra09699a1.pdf]

## Supporting Information

### **SnO<sub>2</sub> decorated graphene nanocomposite anode materials prepared via an up-scalable wet-mechanochemical process for sodium ion battery**

*Sheng Li<sup>a</sup>, Yazhou Wang<sup>a</sup>, Jingxia Qiu<sup>a</sup>, Min Ling<sup>a</sup>, Haihui Wang<sup>b</sup>, Wayde Martens<sup>c</sup>, Shanqing Zhang<sup>a\*</sup>*

<sup>a</sup> Centre for Clean Environmental and Energy, Environmental Futures Research Institute, and Griffith School of Environment, Griffith University, Gold Coast, QLD 4222, Australia

<sup>b</sup> College of Chemistry and Chemical Engineering, South China University of Technology, Guangzhou 510640, China

<sup>c</sup> Discipline of Nanotechnology and Molecular Science, Queensland University of Technology, GPO Box 2434, Brisbane, Queensland 4001, Australia

E-mail: [s.zhang@griffith.edu.au](mailto:s.zhang@griffith.edu.au);

Tel: +61-7-5552-8155

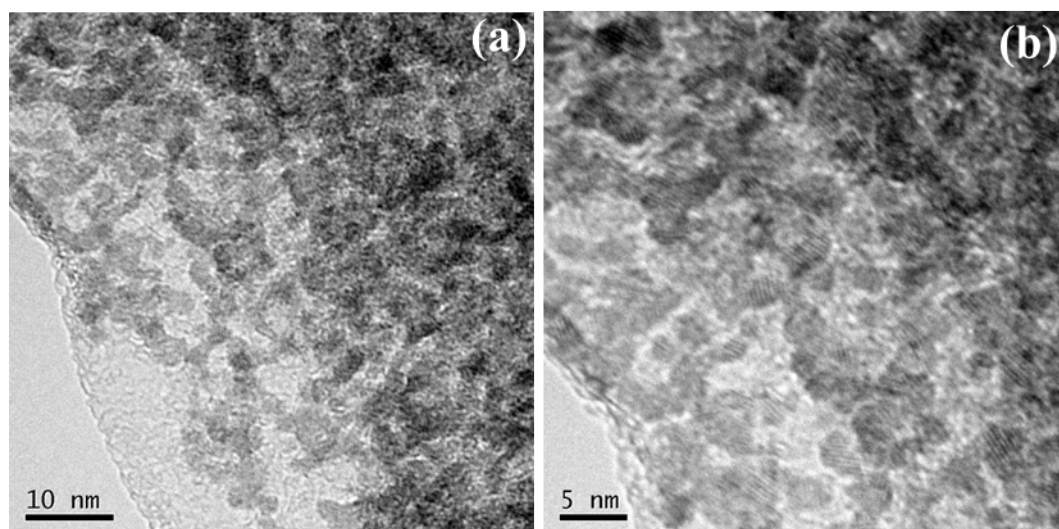

**Fig .S1** HR-TEM images of SnO<sub>2</sub>@graphene sample.
